# Supplementary material
Source: PubMed Central journal article supplement (PMC3047614)
Supplement: cc0917_3428SD1.pdf [file cc0917_3428SD1.pdf]

**Table 1**

## FAS ChIP Q-PCR primers

| Primer Name    | Sequence                      |
|----------------|-------------------------------|
| Q-FAS -1849 F  | GGACTCTCAGGAATATGCTGGTAAAA    |
| Q-FAS -1849 R  | ACAGTTTGGGCATCTCTAAAGGTTAT    |
| Q-FAS -614 R   | GGAACGGTAGATAGCTCTTAGGTAGTTT  |
| Q-FAS -614 F   | AACATACCTTCTGTAAAATTCATGCTAAA |
| Q-FAS -19 F    | ATGCCCATTTGTGCAACGA           |
| Q-FAS -19 R    | CCTGCGCGCGGGTAG               |
| Q-FAS +783 F   | GTTGGAGAGAGGAGCGGAACT         |
| Q-FAS +783 R   | CGGACCTTTGGCTTGGCT            |
| Q-FAS +3833 F  | CAAATTATCTTGGGCCCCCAA         |
| Q-FAS +3833 R  | CCTATTACAAAACATGTGCTCATCAA    |
| Q-FAS +12633 F | GAACCTTGAAGGCCTGCATC          |
| Q-FAS +12633 R | GGACAGGGCTTATGGCAGAAT         |
| Q-FAS +17191 F | GGGCAGGTGAAAGGAAAGCTA         |
| Q-FAS +17191 R | GCAGTCTGGTTCATCCCCATT         |
| Q-FAS +20112 F | GGTTATATTCTCCTTTCCCCAAC       |
| Q-FAS +20112 R | TTGGTTTTTCTTCACATCTTTCCAT     |
| Q-FAS +22797 R | TGCCACTGTTTCCTAGAAAGCAA       |
| Q-FAS +22797 F | ATTTTTATTTGTCTTTCTCTGCTTCCA   |
| Q-FAS +23640 F | CACCACTATTGCTGGAGTCATGA       |
| Q-FAS +23640 R | CCATTCTTTCGAACAAAGCCTTT       |
| Q-FAS +25242 F | TGCCCTTGTGTTTGAATT            |
| Q-FAS +25242 R | CAAAAAGCAAGCCCCTACCA          |
| Q-FAS +27094 F | TTTCATTCTGCTTTTTTTAATTTTCT    |
| Q-FAS +27094 R | AATAAAGTCTGTCTGCACTGCAAGA     |
